# Supplementary material
Source: HighWire-hosted journal article supplement (https://bmjopen.bmj.com/content/7/6/e014912)
Supplement: inline-supplementary-material-1 [file inline-supplementary-material-1.pdf]

## Supplementary File 1: Psychological and behavioral therapies

|                                                                                                                                                                                                                                                                                                                                                                                                                                                                                                                                                                                                                                                                                        |                                                                                                                                                                                                                                                                                                                                                                                                                                                                                                                                                                                                                                  |
|----------------------------------------------------------------------------------------------------------------------------------------------------------------------------------------------------------------------------------------------------------------------------------------------------------------------------------------------------------------------------------------------------------------------------------------------------------------------------------------------------------------------------------------------------------------------------------------------------------------------------------------------------------------------------------------|----------------------------------------------------------------------------------------------------------------------------------------------------------------------------------------------------------------------------------------------------------------------------------------------------------------------------------------------------------------------------------------------------------------------------------------------------------------------------------------------------------------------------------------------------------------------------------------------------------------------------------|
| <p><b>Behavior Therapy / Behavior Modification</b></p> <ul style="list-style-type: none"> <li>• Activity Scheduling</li> <li>• Assertiveness Training</li> <li>• Aversion Therapy</li> <li>• Behavior Contracting</li> <li>• Behavior Modification</li> <li>• Biofeedback, Psychology</li> <li>• Contingency Management</li> <li>• Conversion Therapy</li> <li>• Distraction Therapy</li> <li>• Exposure Therapy</li> <li>• Pleasant Events</li> <li>• Psychoeducation</li> <li>• Problem-Focused</li> <li>• Reciprocal Inhibition Therapy</li> <li>• Relaxation Techniques</li> <li>• Response Cost</li> <li>• Sleep Phase Chronotherapy</li> <li>• Social Skills Training</li> </ul> | <p><b>Cognitive Behavioral Therapy</b></p> <ul style="list-style-type: none"> <li>• Problem Solving</li> <li>• Rational Emotive Therapy</li> <li>• Reality Therapy</li> <li>• Restructuring</li> <li>• Role Play</li> <li>• Schemas</li> <li>• Self-Control</li> <li>• Stress Management</li> </ul>                                                                                                                                                                                                                                                                                                                              |
| <p><b>Psychodynamic Therapies</b></p> <ul style="list-style-type: none"> <li>• Brief Psychotherapy</li> <li>• Countertransference</li> <li>• Freudian</li> <li>• Group Therapy</li> <li>• Insight Oriented Therapy</li> <li>• Jungian</li> <li>• Kleinian</li> <li>• Object Relations</li> <li>• Person Centered Therapy, Client-Centered Therapy</li> <li>• Psychoanalytic Therapy</li> <li>• Short-Term Psychotherapy</li> <li>• Transference</li> </ul>                                                                                                                                                                                                                             | <p><b>Third Wave Cognitive Behavioral Therapies</b></p> <ul style="list-style-type: none"> <li>• Acceptance And Commitment Therapy (ACT)</li> <li>• Behavioral Activation</li> <li>• Cognitive Behavioral Analysis System Of Psychotherapy (CBASP)</li> <li>• Compassion-Focused</li> <li>• Dialectical Behavior Therapy</li> <li>• Diffusion</li> <li>• Functional Analytic Psychotherapy (FAP)</li> <li>• Metacognitive Therapy</li> <li>• Mind Training</li> <li>• Mindfulness</li> </ul>                                                                                                                                     |
| <p><b>Humanistic Therapies</b></p> <ul style="list-style-type: none"> <li>• Existential Therapy</li> <li>• Experiential Therapy</li> <li>• Expressive Therapy</li> <li>• Griefwork</li> <li>• Rogerian</li> <li>• Non-Directive Therapy</li> <li>• Supportive Therapy</li> <li>• Transactional Analysis</li> </ul>                                                                                                                                                                                                                                                                                                                                                                     | <p><b>Integrative Therapies</b></p> <ul style="list-style-type: none"> <li>• Cognitive Analytical Therapy</li> <li>• Counselling</li> <li>• Eclectic Therapy</li> <li>• Interpersonal Therapy</li> <li>• Multimodal</li> <li>• Transtheoretical</li> </ul>                                                                                                                                                                                                                                                                                                                                                                       |
| <p><b>Systemic Therapies</b></p> <ul style="list-style-type: none"> <li>• Conjoint Therapy</li> <li>• Integrative Behavioral Couple Therapy (IBCT)</li> <li>• Narrative Therapy</li> <li>• Personal Construct</li> <li>• Socioenvironmental Therapy</li> <li>• Solution Focused Brief Therapy</li> </ul>                                                                                                                                                                                                                                                                                                                                                                               | <p><b>Other Psychologically-Oriented Interventions</b></p> <ul style="list-style-type: none"> <li>• Acting Out</li> <li>• Age Regression Therapy</li> <li>• Art Therapy</li> <li>• Bibliotherapy</li> <li>• Catharsis</li> <li>• Colour Therapy</li> <li>• Crisis Intervention</li> <li>• Dance Therapy</li> <li>• Drama Therapy</li> <li>• Emotional Freedom Techniques</li> <li>• Hypnotherapy</li> <li>• Meditation<sup>1</sup></li> <li>• Morita Therapy</li> <li>• Music Therapy</li> <li>• Play Therapy</li> <li>• Primal Therapy</li> <li>• Psychodrama</li> <li>• Reminiscence Therapy</li> <li>• Sex Therapy</li> </ul> |

Source: CCDAN<sup>1</sup>

## Supplementary File 1: Complementary and alternative medicine interventions

|                                                                                                                                                                                                                                                                                                                                                                                                                                                                                              |                                                                                                                                                                                                                                                                                                                                                                                                                                                                                                                                                                                                                                                                                                                                                                                                                                                                 |
|----------------------------------------------------------------------------------------------------------------------------------------------------------------------------------------------------------------------------------------------------------------------------------------------------------------------------------------------------------------------------------------------------------------------------------------------------------------------------------------------|-----------------------------------------------------------------------------------------------------------------------------------------------------------------------------------------------------------------------------------------------------------------------------------------------------------------------------------------------------------------------------------------------------------------------------------------------------------------------------------------------------------------------------------------------------------------------------------------------------------------------------------------------------------------------------------------------------------------------------------------------------------------------------------------------------------------------------------------------------------------|
| <p><b>Dietary Supplements</b></p> <ul style="list-style-type: none"> <li>• 5-hydroxy-L-tryptophan</li> <li>• Carnitine/Acetyl-L-carnitine</li> <li>• Chromium</li> <li>• Folate</li> <li>• Glutamine</li> <li>• Inositol</li> <li>• Magnesium</li> <li>• Omega-3-fatty acids (fish oil)</li> <li>• Phenylalanine</li> <li>• SAME (s-adenosylmethionine)</li> <li>• Selenium</li> <li>• Tyrosine</li> <li>• Vitamin B6</li> <li>• Vitamin B12</li> <li>• Vitamin D</li> <li>• Zinc</li> </ul> | <p><b>Other CAM Therapies</b></p> <ul style="list-style-type: none"> <li>• Acupuncture</li> <li>• Aromatherapy</li> <li>• Autogenic training</li> <li>• Ayurveda</li> <li>• Bach Flower Remedies</li> <li>• Bibliotherapy</li> <li>• Craniosacral therapy</li> <li>• Distraction</li> <li>• Dolphins (swimming with)</li> <li>• Homeopathy</li> <li>• Humor/humor therapy</li> <li>• Hydrotherapy</li> <li>• LeShan distance healing</li> <li>• Massage</li> <li>• Meditation</li> <li>• Melatonin</li> <li>• Music</li> <li>• Nature-assisted therapy</li> <li>• Negative air ionisation</li> <li>• Painkillers</li> <li>• Pets</li> <li>• Prayer</li> <li>• Qigong</li> <li>• Recreational dancing</li> <li>• Reiki</li> <li>• Relaxation training</li> <li>• Sleep deprivation</li> <li>• Tai chi</li> <li>• Yoga</li> <li>• Young tissue extract</li> </ul> |
| <p><b>Herbal Remedies</b></p> <ul style="list-style-type: none"> <li>• Borage</li> <li>• Ginkgo biloba</li> <li>• Kampo</li> <li>• Lavender</li> <li>• Marijuana</li> <li>• Rhodiola rosea (golden root)</li> <li>• Saffron</li> <li>• Schizandra</li> <li>• St John's wort</li> <li>• Traditional Chinese herbal medicine</li> </ul>                                                                                                                                                        |                                                                                                                                                                                                                                                                                                                                                                                                                                                                                                                                                                                                                                                                                                                                                                                                                                                                 |

Source: beyondblue: A guide to what works for depression [<http://resources.beyondblue.org.au/prism/file?token=BL/0556>]

1. Cochrane Depression, Anxiety, and Neurosis Group. CCDAN Topic List: Intervention - Psychological therapies. The Cochrane Collaboration: London, 2013.  
[http://cmd.cochrane.org/sites/cmd.cochrane.org/files/public/uploads/CCDAN%20topics%20list\\_psychological%20therapies%20for%20website\\_0.pdf](http://cmd.cochrane.org/sites/cmd.cochrane.org/files/public/uploads/CCDAN%20topics%20list_psychological%20therapies%20for%20website_0.pdf) Accessed July 5, 2016.
